# Supplementary material
Source: Springer Nature journal article supplement (https://www.springermedizin.de/resource/supplementary/12888_2013_1542_MOESM1_ESM.pdf/9481318)
Supplement: MOESM1 [file 9481318]

## Enrollment

Assessed for eligibility (n=134)

Excluded (n=88)

- ◆ Not meeting inclusion criteria (n=25)
- ◆ Declined to participate (n=46)
- ◆ Discharged/transferred (n=17)

Randomized (n=46)

## Allocation

Allocated to peer support (n=23)

- ◆ Received allocated intervention (n=20)
- ◆ Did not receive allocated intervention (delayed discharged) (n=3)

Allocated to care as usual (n=23)

- ◆ Received allocated intervention (n=22)
- ◆ Did not receive allocated intervention (delayed discharge) (n=1)

## 1 month follow-up

Included in analysis (n=14)

- ◆ Lost to follow-up (no contact) (n=4)
- ◆ Lost to follow-up (withdrew) (n=1)
- ◆ Relapsed and re-admitted (n=1)

Included in analysis (n=12)

- ◆ Lost to follow-up (no contact) (n=5)
- ◆ Lost to follow-up (withdrew) (n=2)
- ◆ Relapsed and re-admitted (n=3)

## 3 month follow-up

Included in analysis (n=6)

- ◆ Lost to follow-up (no contact) (n=6)
- ◆ Relapsed and re-admitted (n=1)
- ◆ Died (unrelated to study) (n=1)

Included in analysis (n=9)

- ◆ Lost to follow-up (no contact) (n=2)
- ◆ Lost to follow-up (withdrew) (n=1)
